# Supplementary material for: Nightly biting cycles of malaria vectors in a heterogeneous transmission area of eastern Amazonian Brazil
Source: PubMed Central journal article supplement (PMC3729824; doi:10.1186/1475-2875-12-262), 2013-07-26

**Additional file 1 Mean ( $\pm$ SE) monthly human landing catch (HLC) for *An. darlingi*, *An. marajoara* and *An. nuneztovari* from April 2003 to November 2003 in Santo Antônio**

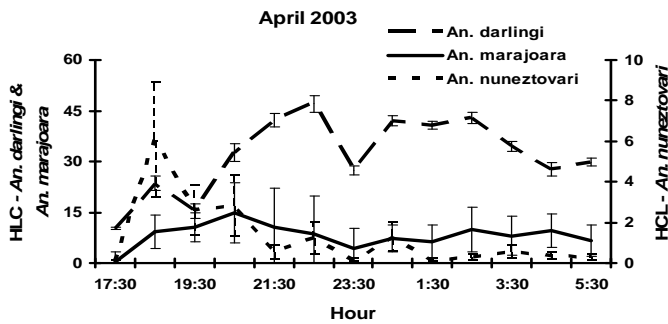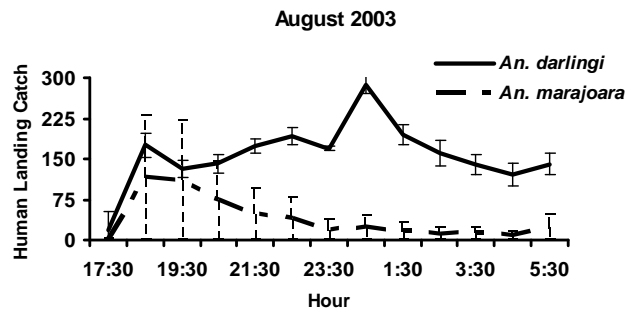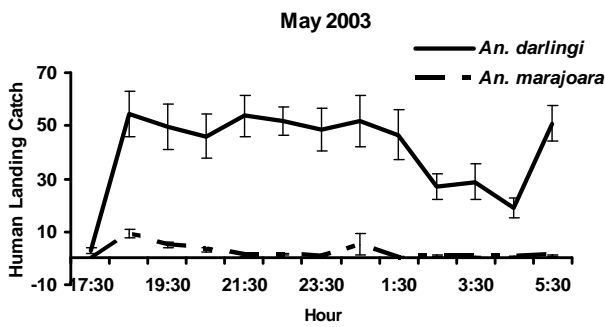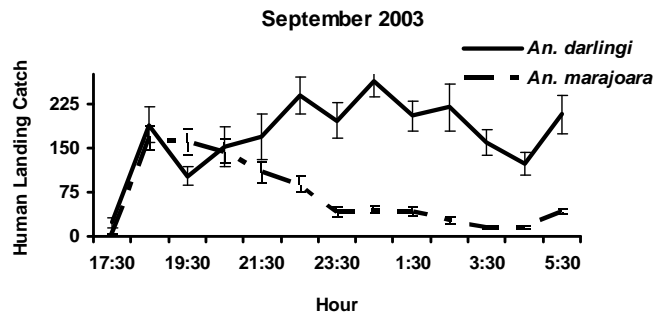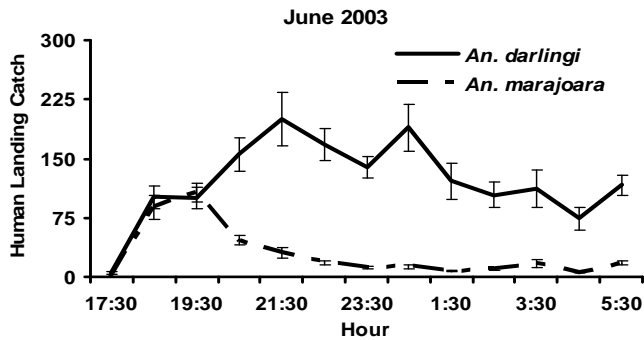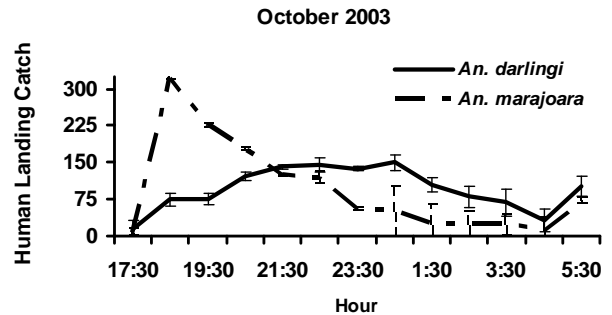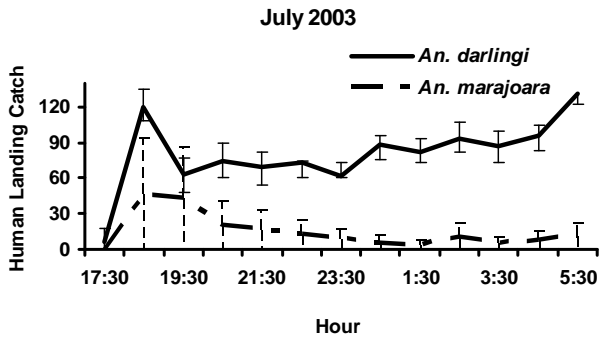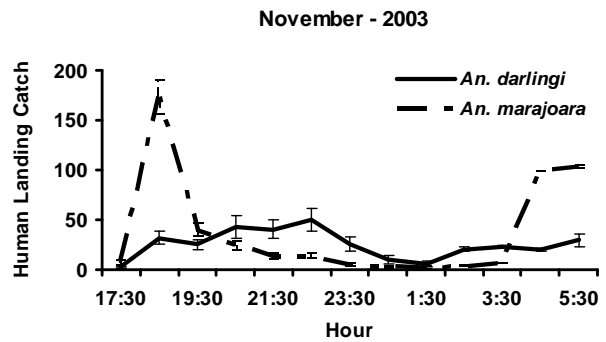

Additional file 1 (cont) Mean ( $\pm$ SE) monthly human landing catch (HLC) for *An. darlingi*, *An. marajoara* and *An. nuneztovari* from February 2004 to September 2004 in Santo Antônio

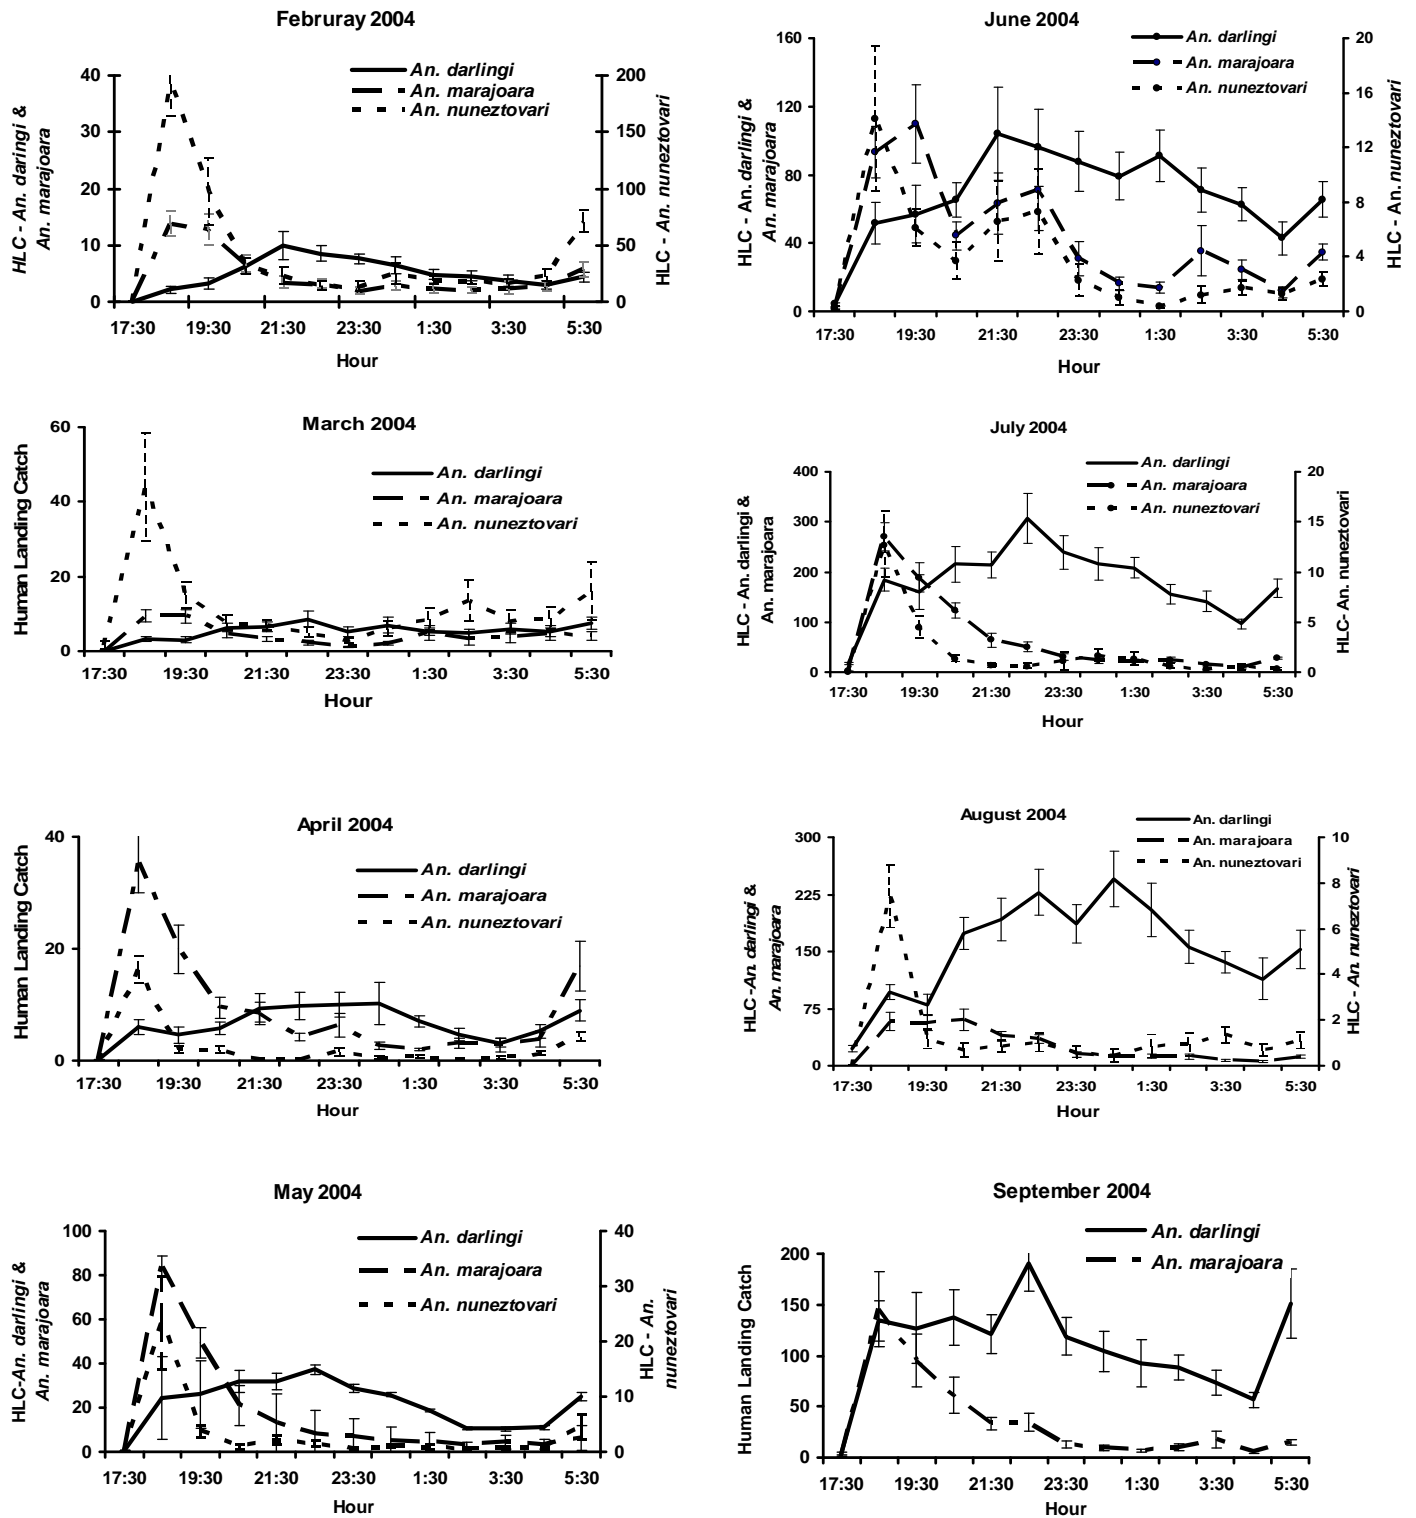

**Additional file 1 (cont) Mean ( $\pm$ SE) monthly human landing catch (HLC) for *An. darlingi*, *An. marajoara* and *An. nuneztovari*, October 2004 and November 2004 in Santo Ant3nio**

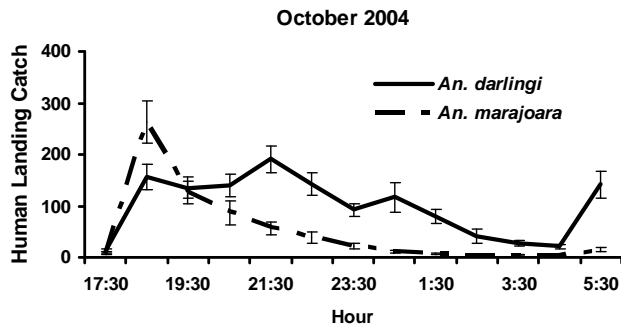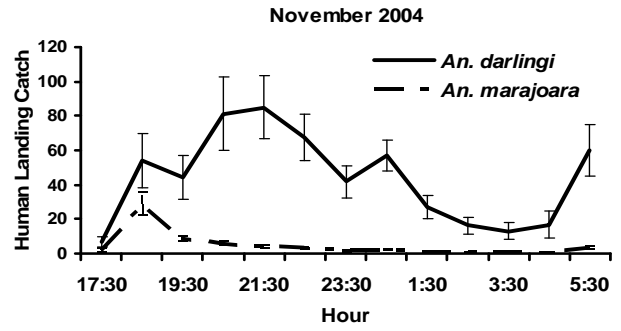

**Additional file 1 (cont) Mean ( $\pm$ SE) monthly human landing catch (HLC) for *An. darlingi*, *An. marajoara* and *An. nuneztovari* from February 2005 to September 2005 in Santo Antônio**

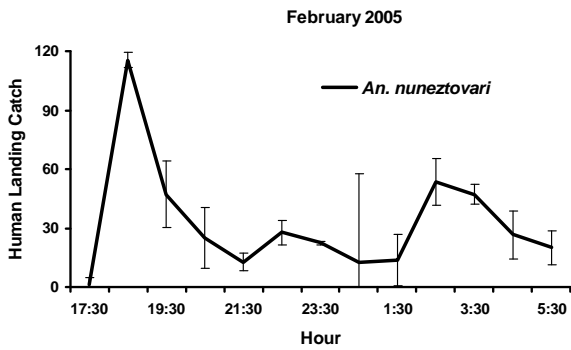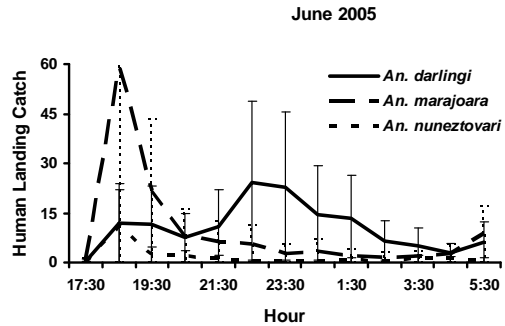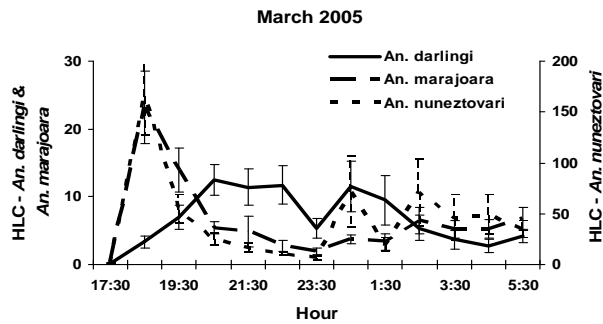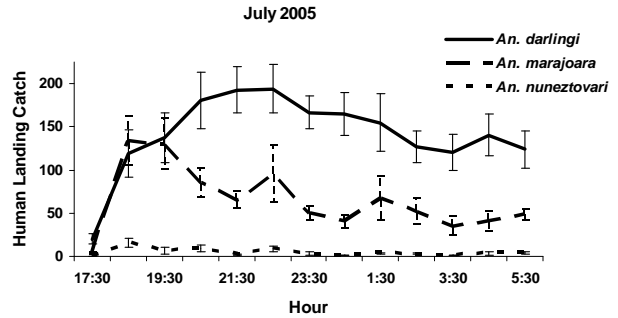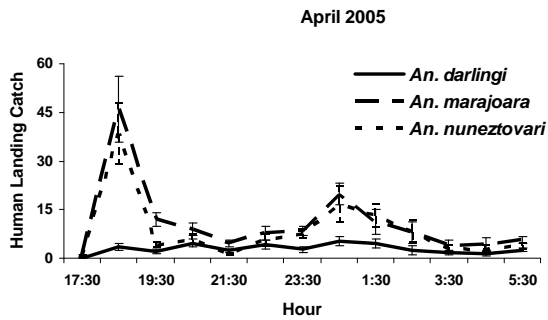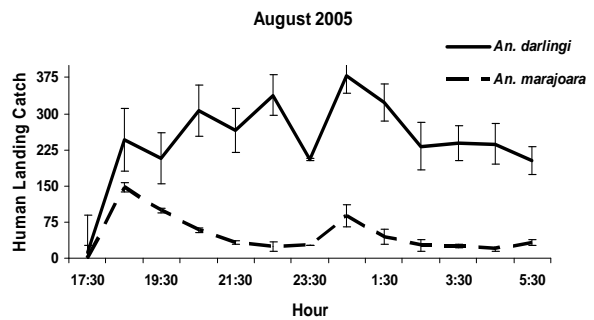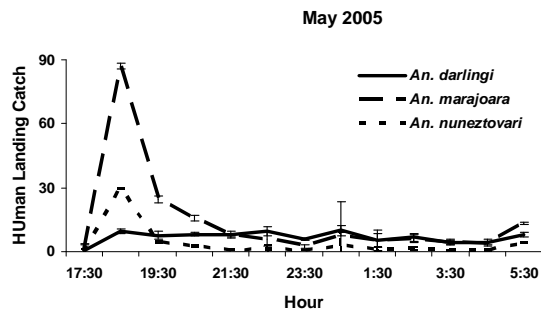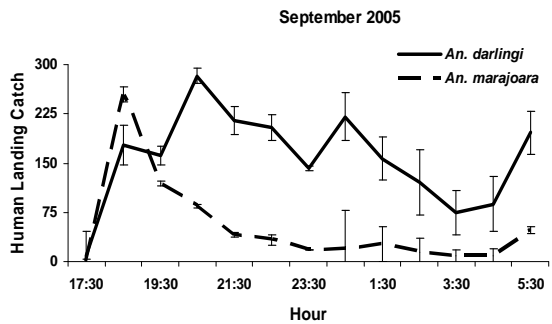

**Additional file 1 (cont.) Mean ( $\pm$ SE) monthly human landing catch (HLC) for *An. darlingi*, *An. marajoara* and *An. nuneztovari*, October 2005 and November 2005 in Santo Antônio**

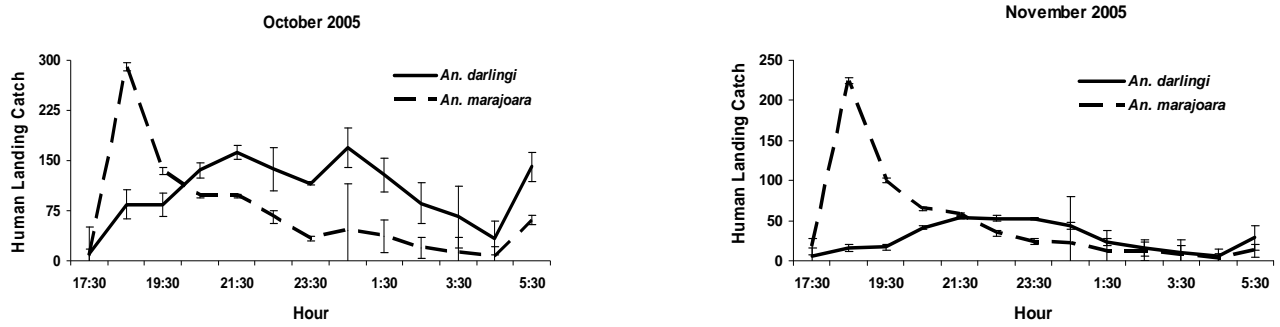

Supplement: 1475-2875-12-262-S1.pdf [file 1475-2875-12-262-S1.pdf]
