# Supplementary material for: Nightly biting cycles of malaria vectors in a heterogeneous transmission area of eastern Amazonian Brazil
Source: PubMed Central journal article supplement (PMC3729824; doi:10.1186/1475-2875-12-262), 2013-07-26

**Additional file 3 Mean ( $\pm$ SE) monthly human landing catch for *An. darlingi*, *An. marajoara* and *An. nuneztovari* from April 2003 to October 2003 in São João**

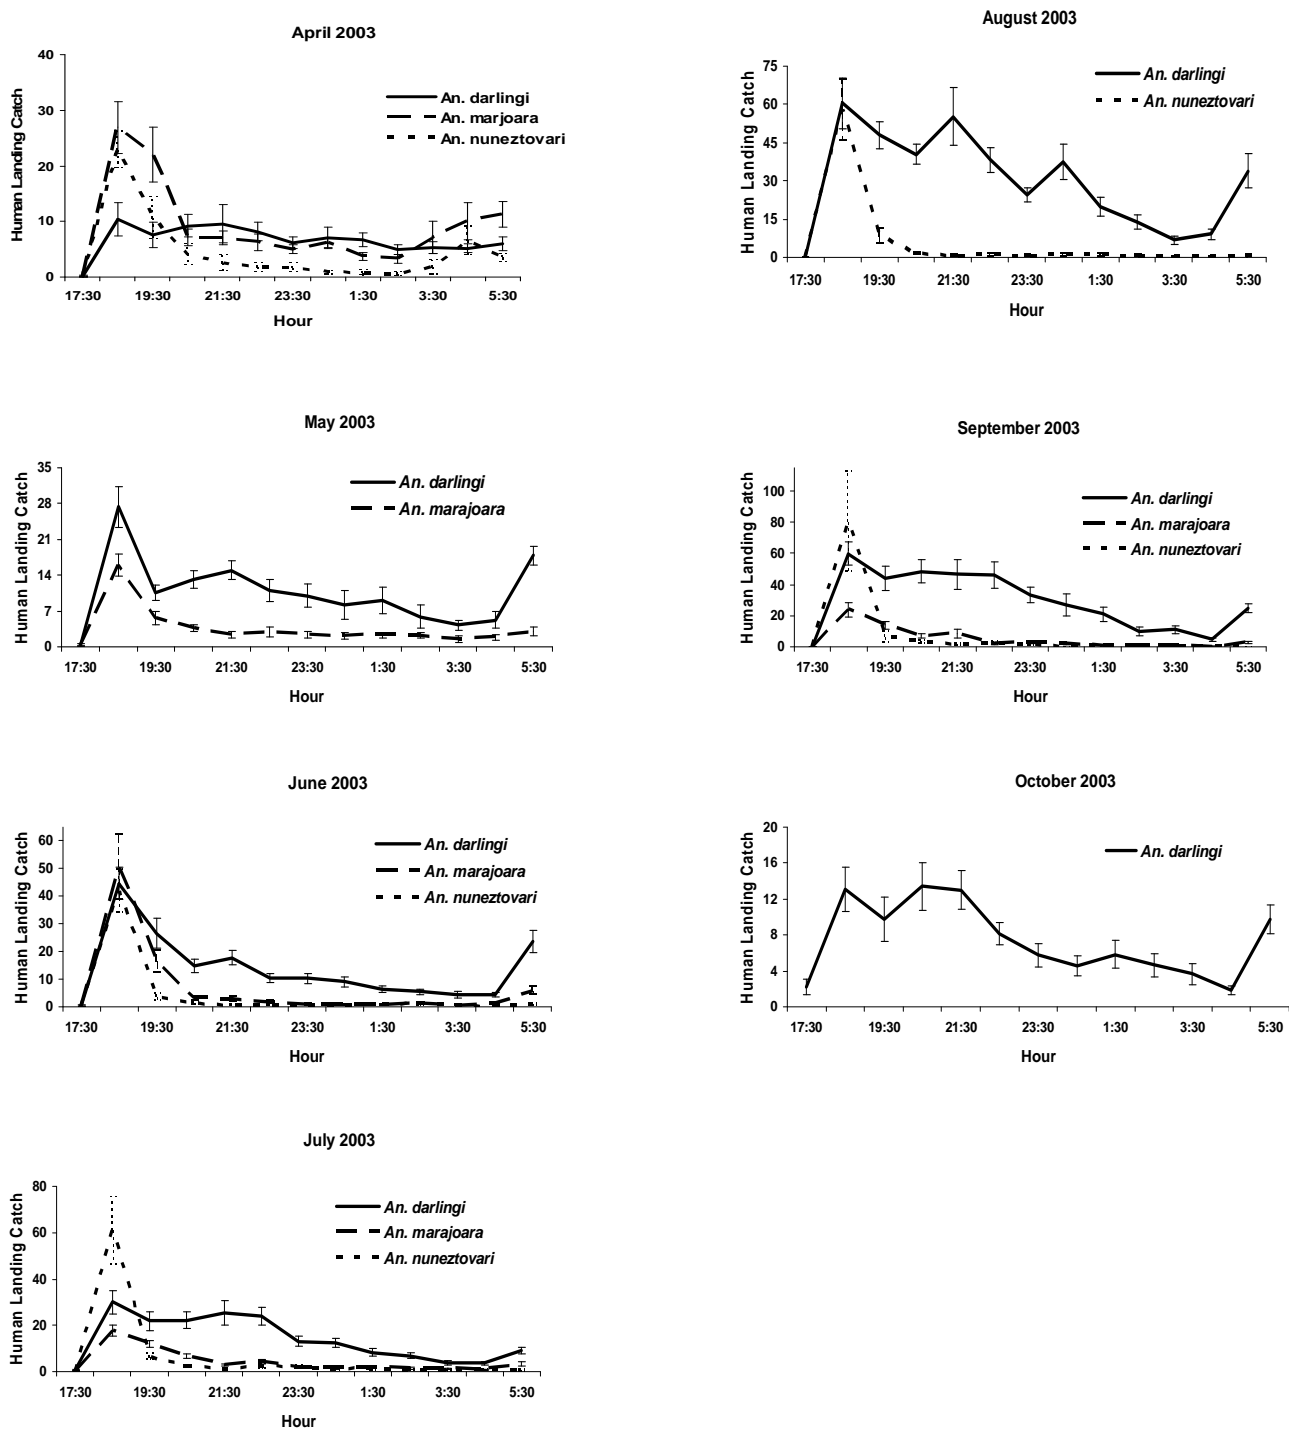

**Additional file 3 (cont) Mean ( $\pm$ SE) monthly human landing catch for *An. darlingi*, *An. marajoara* and *An. nuneztovari* from February 2004 to September 2004 in São João**

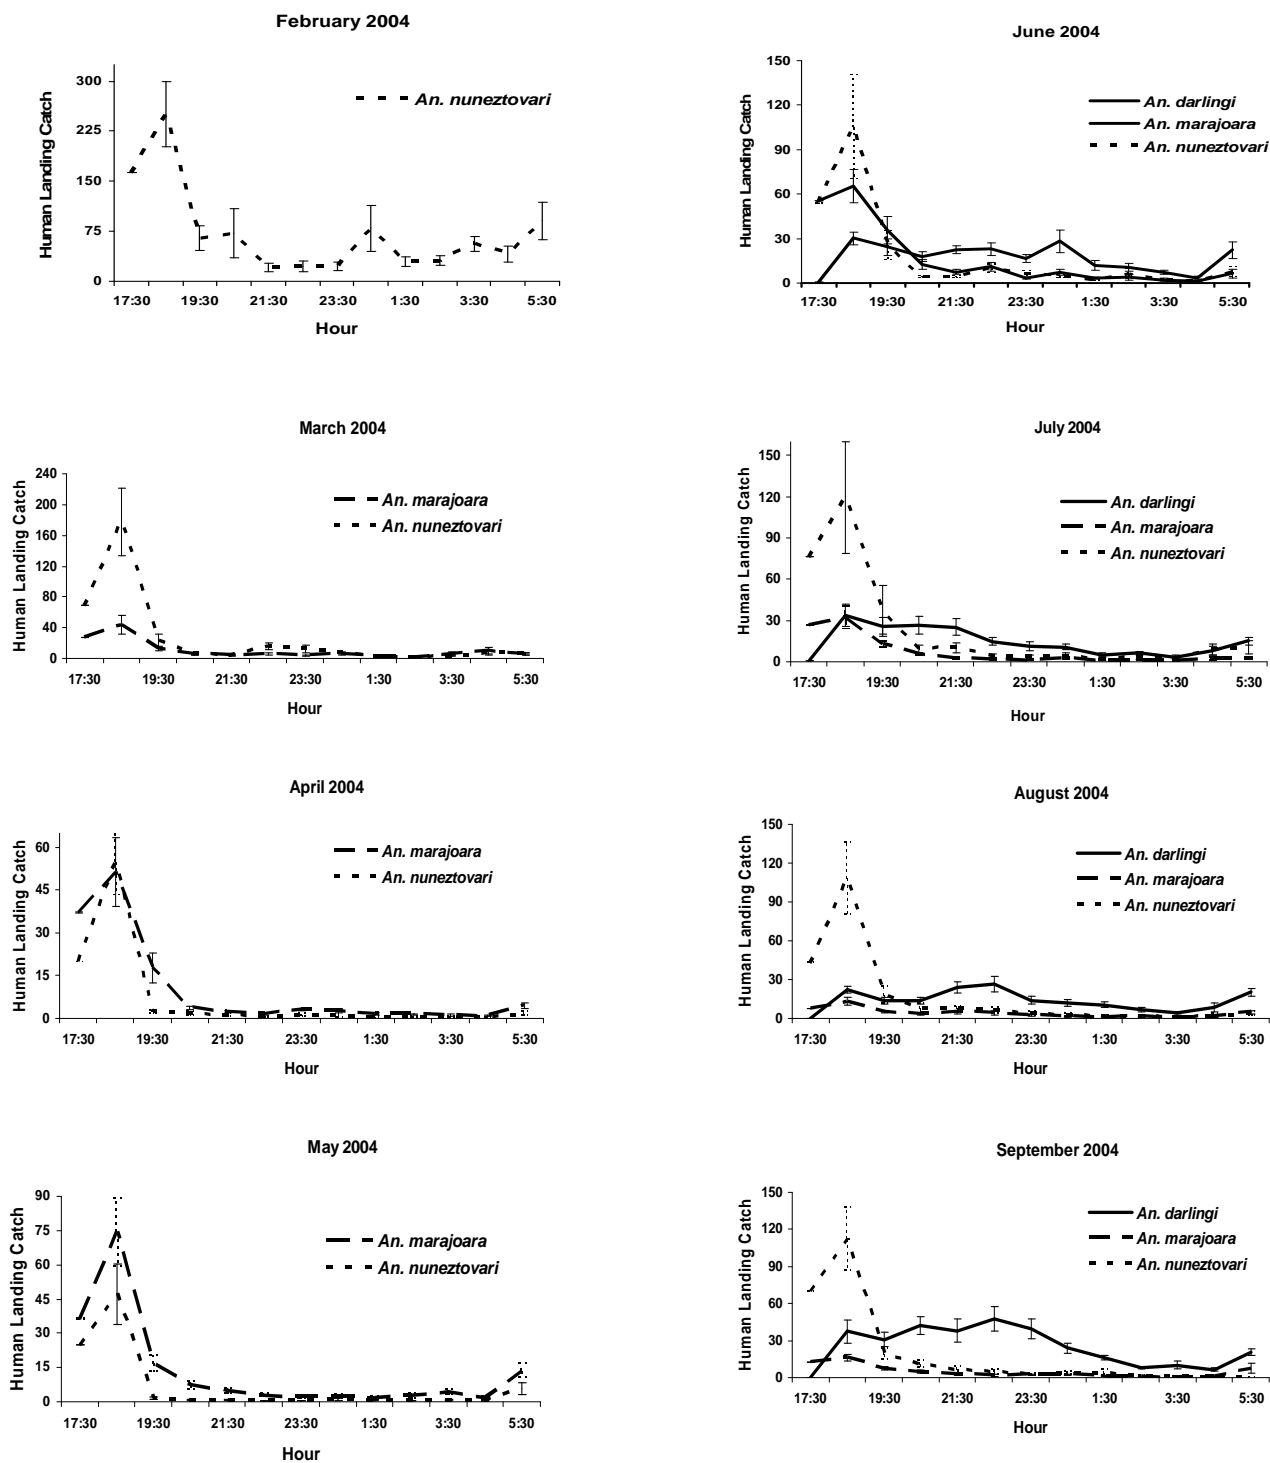

**Additional file 3 (cont) Mean ( $\pm$ SE) monthly human landing catch for *An. darlingi*, *An. marajoara* and *An. nuneztovari*, October 2004 in São João**

---

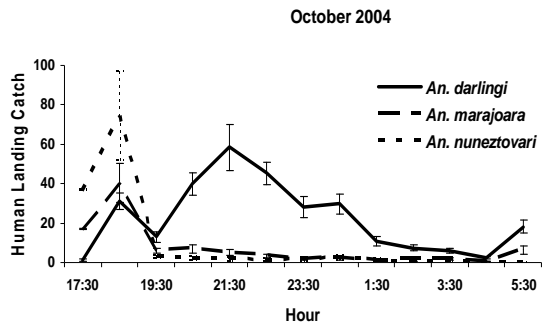

**Additional file 3 (cont.) Mean ( $\pm$ SE) monthly human landing catch (HLC) for *An. darlingi*, *An. marajoara* and *An. nuneztovari* from February 2005 to September 2005 in São João**

Sao Joao - February 2005

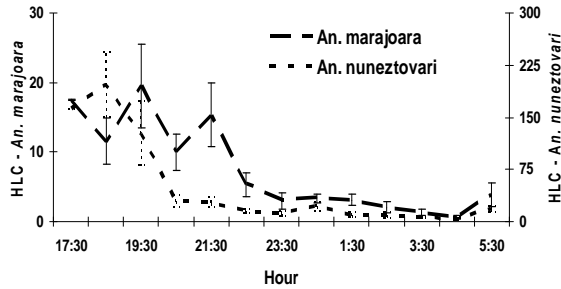

Sao Joao - June 2005

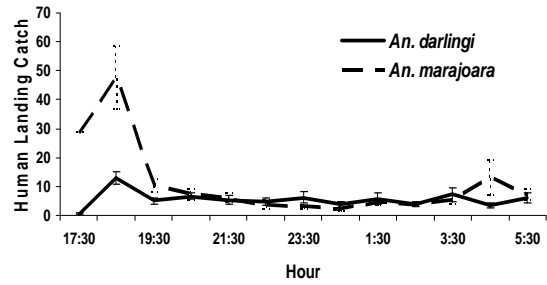

Sao Joao - March 2005

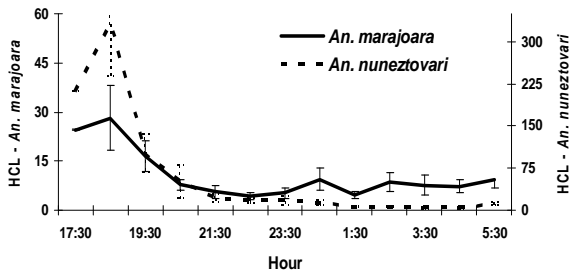

Sao Joao - July 2005

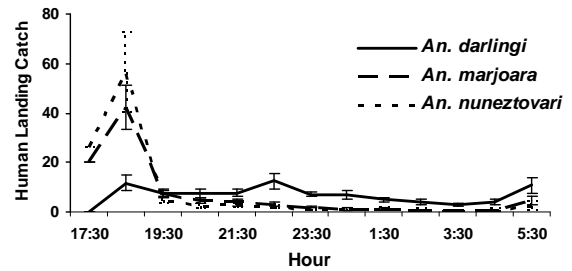

Sao Joao - April 2005

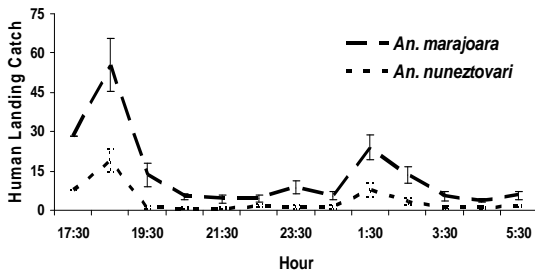

Sao Joao - August 2005

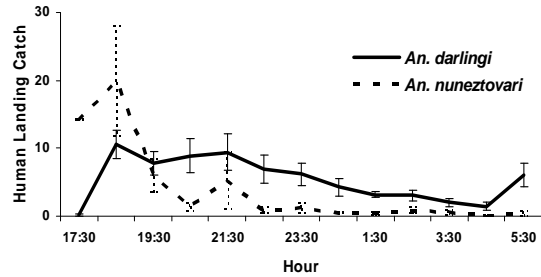

Sao Joao - May 2005

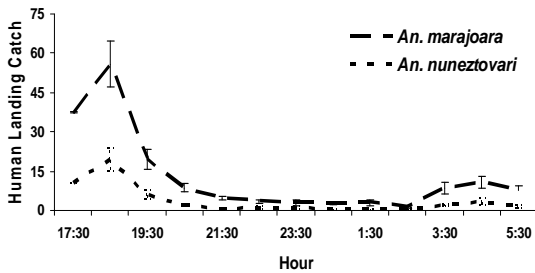

Sao Joao - September 2005

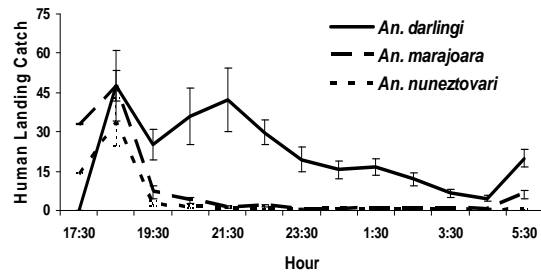

**Additional file 3 (cont) Mean ( $\pm$ SE) monthly human landing catch for *An. darlingi*, *An. marajoara* and *An. nuneztovari*, October 2005 in São João**

---

Sao Joao - October 2005

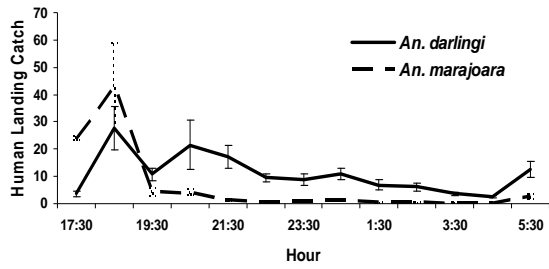

Supplement: 1475-2875-12-262-S3.pdf [file 1475-2875-12-262-S3.pdf]
