# Supplementary material for: Nightly biting cycles of malaria vectors in a heterogeneous transmission area of eastern Amazonian Brazil
Source: PubMed Central journal article supplement (PMC3729824; doi:10.1186/1475-2875-12-262), 2013-07-26

**Additional file 2 Mean ( $\pm$ SE) monthly human landing catch for *An. darlingi*, *An. marajoara* and *An. nuneztovari* in São Raimundo**

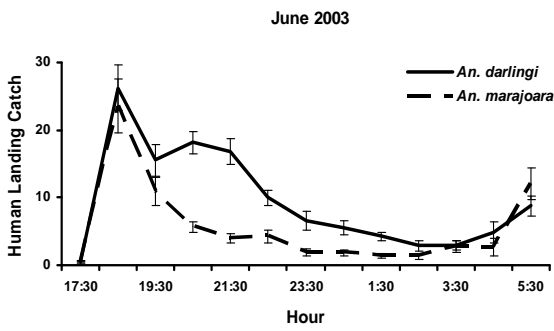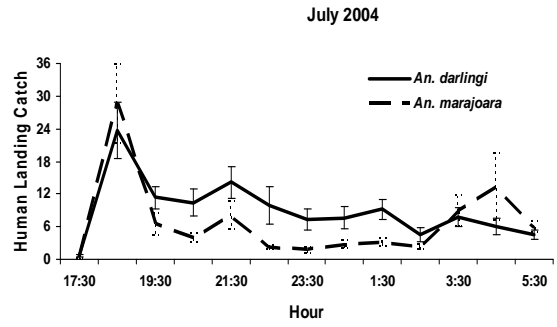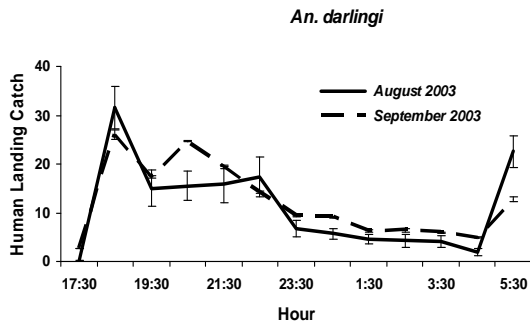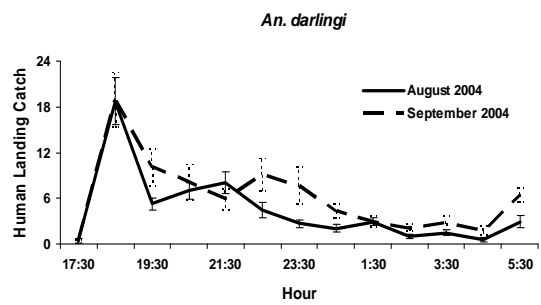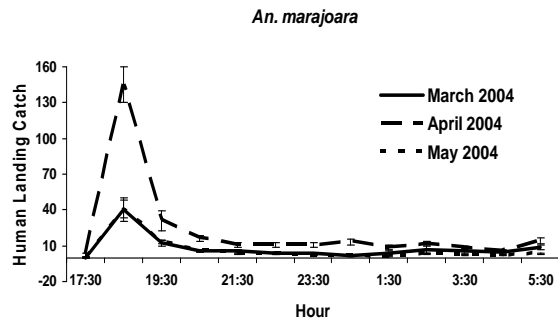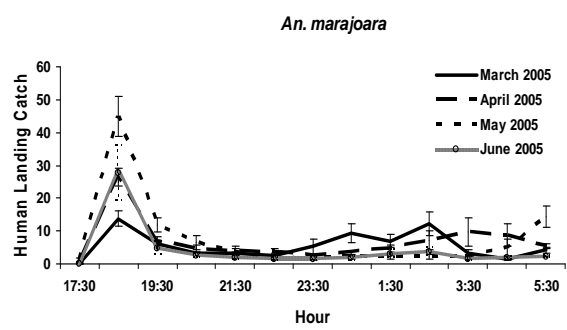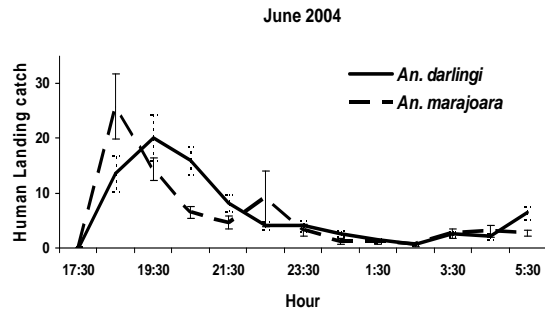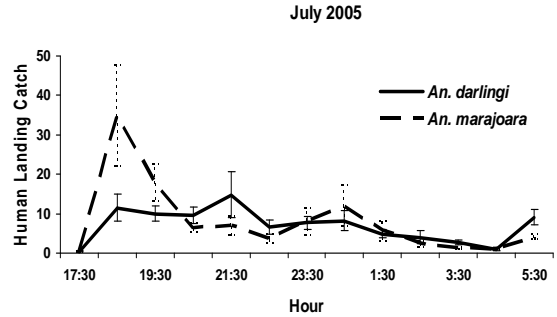

**Additional file 2 (cont) Mean ( $\pm$ SE) monthly human landing catch for *An. darlingi*, *An. marajoara* and *An. nuneztovari* in São Raimundo**

---

*An. darlingi*

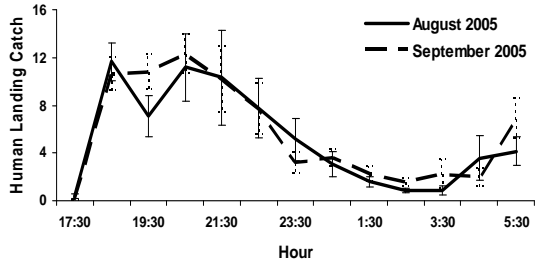

*An. nuneztovari*

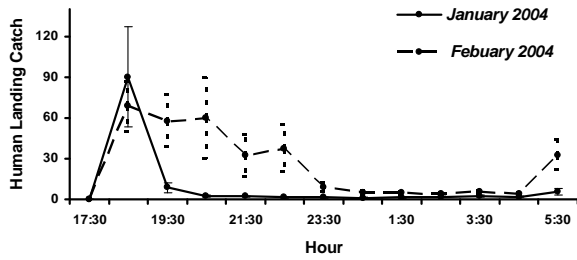

*An. nuneztovari*

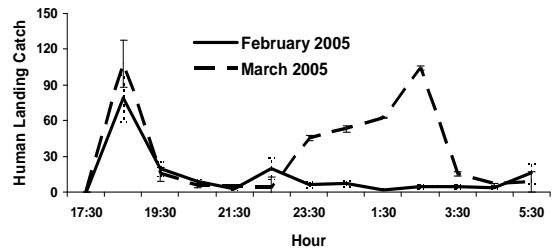

Supplement: 1475-2875-12-262-S2.pdf [file 1475-2875-12-262-S2.pdf]
