# Supplementary material for: Nightly biting cycles of malaria vectors in a heterogeneous transmission area of eastern Amazonian Brazil
Source: PubMed Central journal article supplement (PMC3729824; doi:10.1186/1475-2875-12-262), 2013-07-26

**Additional file 4 Mean monthly human landing catch for *An. intermedius* and *An. triannulatus***

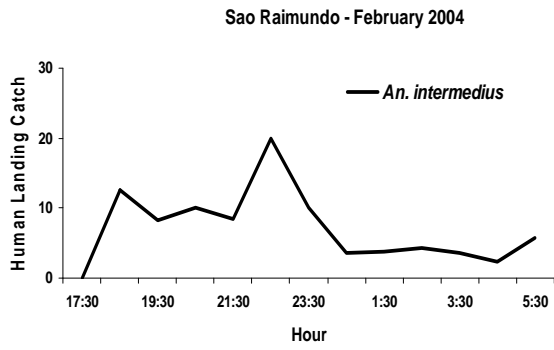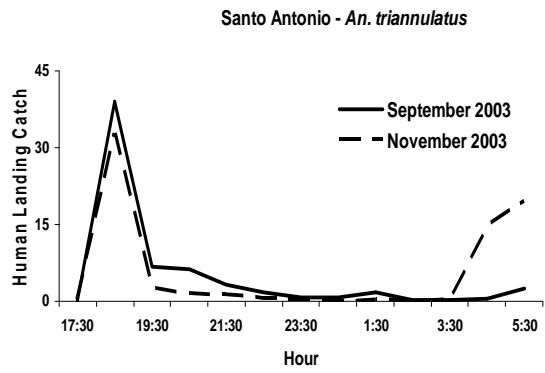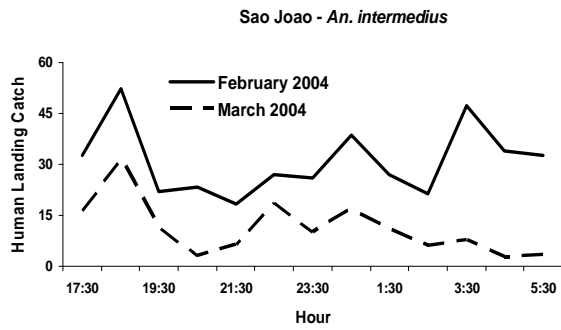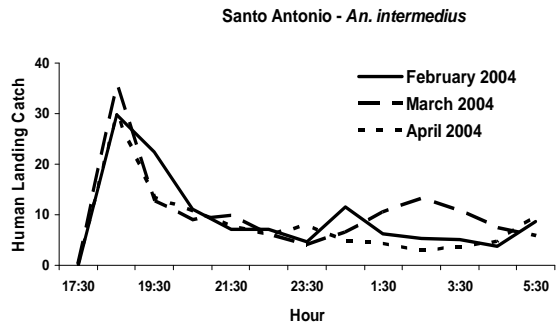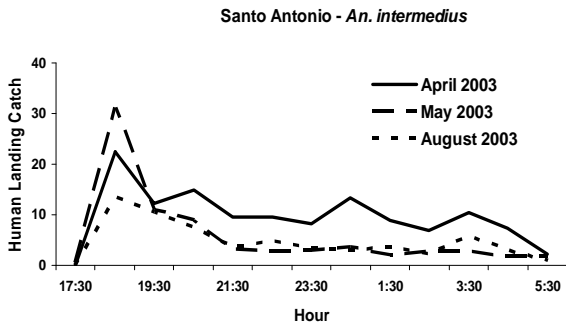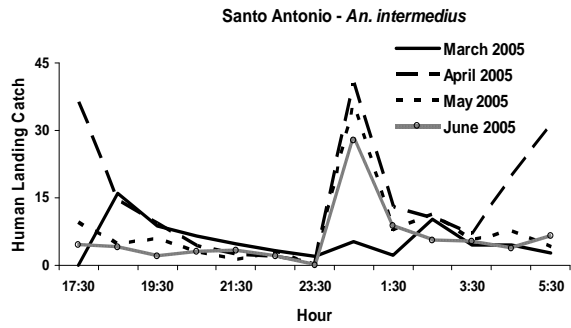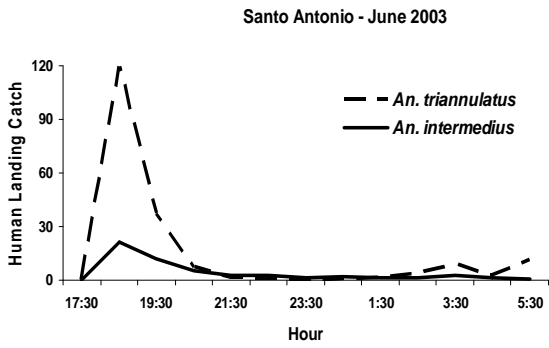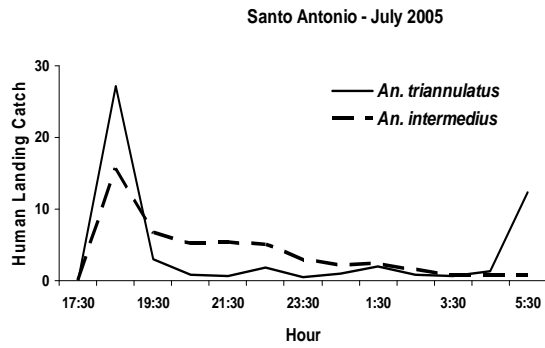

Supplement: 1475-2875-12-262-S4.pdf [file 1475-2875-12-262-S4.pdf]
