# Supplementary material for: Nightly biting cycles of malaria vectors in a heterogeneous transmission area of eastern Amazonian Brazil
Source: PubMed Central journal article supplement (PMC3729824; doi:10.1186/1475-2875-12-262), 2013-07-26
Supplement: 1475-2875-12-262-S5.pdf [file 1475-2875-12-262-S5.pdf]

**Additional file 5 Results of nested ANOVAs to detect sources of variation in skewness and kurtosis of *An. darlingi* and *An. marajoara* in three villages**

**Table 1 Results of nested ANOVA for skewness ( $g_1$ ) of *An. darlingi* hourly landing rates in three Amazonian villages**

|                | <u>Model</u> |          |                      |                              | <u>Year</u> |          | <u>Month</u> | <u>(year)</u> | <u>night</u> | <u>(yearXmo.)</u> | <u>site</u> | <u>(yearXmo.)</u> |
|----------------|--------------|----------|----------------------|------------------------------|-------------|----------|--------------|---------------|--------------|-------------------|-------------|-------------------|
| <u>village</u> | <u>d.f.</u>  | <u>F</u> | <u>R<sup>2</sup></u> | <u>mean <math>g_1</math></u> | <u>d.f.</u> | <u>F</u> | <u>d.f.</u>  | <u>F</u>      | <u>d.f.</u>  | <u>F</u>          | <u>d.f.</u> | <u>F</u>          |
| SA             | 163          | 1.04ns   | 0.523                | 0.585                        | 2           | 1.77ns   | 24           | 1.30ns        | 52           | 0.91ns            | 84          | 1.01ns            |
| SJ             | 124          | 1.02ns   | 0.573                | 1.07                         | 2           | 0.25ns   | 20           | 1.71*         | 37           | 0.94ns            | 62          | 0.79ns            |
| SR             | 84           | 13.79*** | 0.955                | 1.93                         | 2           | 10.28**  | 15           | 22.75***      | 25           | 29.01***          | 41          | 1.13ns            |

**Table 2 Results of nested ANOVA for skewness ( $g_1$ ) of *An. marajoara* hourly landing rates in three Amazonian villages**

|                | <u>Model</u> |          |                      |                              | <u>Year</u> |          | <u>Month</u> | <u>(year)</u> | <u>night</u> | <u>(yearXmo.)</u> | <u>site</u> | <u>(yearXmo.)</u> |
|----------------|--------------|----------|----------------------|------------------------------|-------------|----------|--------------|---------------|--------------|-------------------|-------------|-------------------|
| <u>village</u> | <u>d.f.</u>  | <u>F</u> | <u>R<sup>2</sup></u> | <u>mean <math>g_1</math></u> | <u>d.f.</u> | <u>F</u> | <u>d.f.</u>  | <u>F</u>      | <u>d.f.</u>  | <u>F</u>          | <u>d.f.</u> | <u>F</u>          |
| SA             | 161          | 2.66***  | 0.747                | 1.84                         | 2           | 0.51ns   | 26           | 6.04***       | 51           | 2.05***           | 81          | 1.57**            |
| SJ             | 137          | 2.81***  | 0.852                | 2.29                         | 2           | 2.73ns   | 22           | 6.11***       | 44           | 2.00**            | 69          | 1.48ns            |
| SR             | 74           | 4.91***  | 0.894                | 0.511                        | 2           | 2.46ns   | 11           | 8.59***       | 22           | 7.44***           | 38          | 1.65ns            |

**Table 3 Results of nested ANOVA for kurtosis ( $g_2$ ) of *An. darlingi* hourly landing rates in three Amazonian villages**

|                | <u>Model</u> |          |                      |                              | <u>Year</u> |          | <u>Month</u> | <u>(year)</u> | <u>night</u> | <u>(yearXmo.)</u> | <u>site</u> | <u>(yearXmo.)</u> |
|----------------|--------------|----------|----------------------|------------------------------|-------------|----------|--------------|---------------|--------------|-------------------|-------------|-------------------|
| <u>village</u> | <u>d.f.</u>  | <u>F</u> | <u>R<sup>2</sup></u> | <u>mean <math>g_2</math></u> | <u>d.f.</u> | <u>F</u> | <u>d.f.</u>  | <u>F</u>      | <u>d.f.</u>  | <u>F</u>          | <u>d.f.</u> | <u>F</u>          |
| SA             | 163          | 1.27ns   | 0.571                | 0.503                        | 2           | 2.99ns   | 24           | 1.10ns        | 52           | 1.47*             | 84          | 1.19ns            |
| SJ             | 124          | 0.92ns   | 0.547                | 1.19                         | 2           | 0.43ns   | 20           | 1.50ns        | 37           | 1.02ns            | 62          | 0.59ns            |
| SR             | 84           | 4.06***  | 0.863                | 2.48                         | 2           | 2.15ns   | 15           | 7.73***       | 25           | 4.59***           | 41          | 2.59**            |

**Table 4 Results of nested ANOVA for kurtosis ( $g_2$ ) of *An. marajoara* hourly landing rates in three Amazonian villages**

|                | <b>Model</b> |          |                      |                           | <b>Year</b> |          | <b>Month</b> | <b>(year)</b> | <b>night</b> | <b>(yearXmo.)</b> | <b>site</b> | <b>(yearXmo.)</b> |
|----------------|--------------|----------|----------------------|---------------------------|-------------|----------|--------------|---------------|--------------|-------------------|-------------|-------------------|
| <b>village</b> | <b>d.f.</b>  | <b>F</b> | <b>R<sup>2</sup></b> | <b>mean g<sub>2</sub></b> | <b>d.f.</b> | <b>F</b> | <b>d.f.</b>  | <b>F</b>      | <b>d.f.</b>  | <b>F</b>          | <b>d.f.</b> | <b>F</b>          |
| SA             | 161          | 2.38***  | 0.725                | 3.84                      | 2           | 0.04ns   | 26           | 5.96***       | 51           | 1.56*             | 81          | 1.44**            |
| SJ             | 137          | 2.78***  | 0.850                | 6.12                      | 2           | 2.40ns   | 22           | 5.88***       | 44           | 2.24***           | 69          | 1.48ns            |
| SR             | 74           | 5.23***  | 0.900                | 6.48                      | 2           | 2.90ns   | 11           | 9.73***       | 22           | 7.79***           | 38          | 1.66ns            |

---
